# Supplementary material
Source: Springer Nature journal article supplement (https://www.springermedizin.de/resource/supplementary/12936_2013_2869_MOESM2_ESM.pdf/9544488)
Supplement: MOESM2 [file 9544488]

**A****Nuclear NF- $\kappa$ B p65 expression**

Neurons

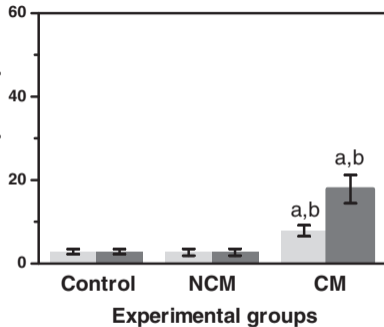**B****Nuclear NF- $\kappa$ B p65 expression**

Glial cells

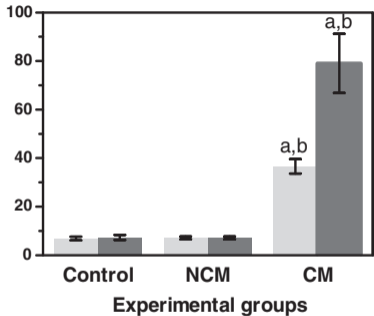

■ % positive cells

■ Total score (% positive cells x intensity)
